# Supplementary material
Source: PubMed Central journal article supplement (PMC10331681)
Supplement: ajtr0015-4118-f5.pdf [file ajtr0015-4118-f5.pdf]

## NLR combined with PLR is a risk factor for AMI patients

**Supplementary Table 1.** Multivariate logistic regression analysis of risk of in-hospital mortality in patients with AMI before propensity score matching

|                 | B     | OR    | 95% CI       | P-value  |
|-----------------|-------|-------|--------------|----------|
| Age             | 0.072 | 1.074 | 1.051-1.098  | < 0.0001 |
| ALT             | 0.000 | 1.000 | 1.000-1.001  | 0.097    |
| CTNI            | 0.012 | 1.108 | 1.081-1.135  | < 0.0001 |
| Heart failure   | 1.582 | 4.867 | 2.286-10.363 | < 0.0001 |
| Type of AMI     | 0.011 | 1.011 | 0.580-1.764  | 0.969    |
| Previous stroke | 1.311 | 3.710 | 1.855-7.421  | < 0.0001 |
| eGFR class      |       |       |              |          |
| > 60 (REF)      | /     | /     | /            | /        |
| 30-60           | 1.365 | 3.914 | 2.293-6.679  | < 0.0001 |
| < 30            | 1.647 | 5.189 | 2.993-8.995  | < 0.0001 |

Note: Type of AMI includes NSTEMI and STEMI, with NSTEMI as a reference; eGFR class included < 30 ml/min/1.73 m<sup>2</sup>, 30-60 ml/min/1.73 m<sup>2</sup>, and > 60 ml/min/1.73 m<sup>2</sup>, and eGFR > 60 ml/min/1.73 m<sup>2</sup> was used as a reference. AMI, acute myocardial infarction; ALT, alanine aminotransferase; NSTEMI, non-ST segment elevation myocardial infarction; STEMI, ST segment elevation myocardial infarction; eGFR, estimated glomerular filtration rate; CTNI, cardiac troponin I.
